# Supplementary material for: Lions as Bone Accumulators? Paleontological and Ecological Implications of a Modern Bone Assemblage from Olduvai Gorge
Source: PubMed Central journal article supplement (PMC4856334; doi:10.1371/journal.pone.0153797), 2016-05-04

## Supporting Information

S2: Figures.

Figure A: Carnivore damage on vertebrae from the OCS.

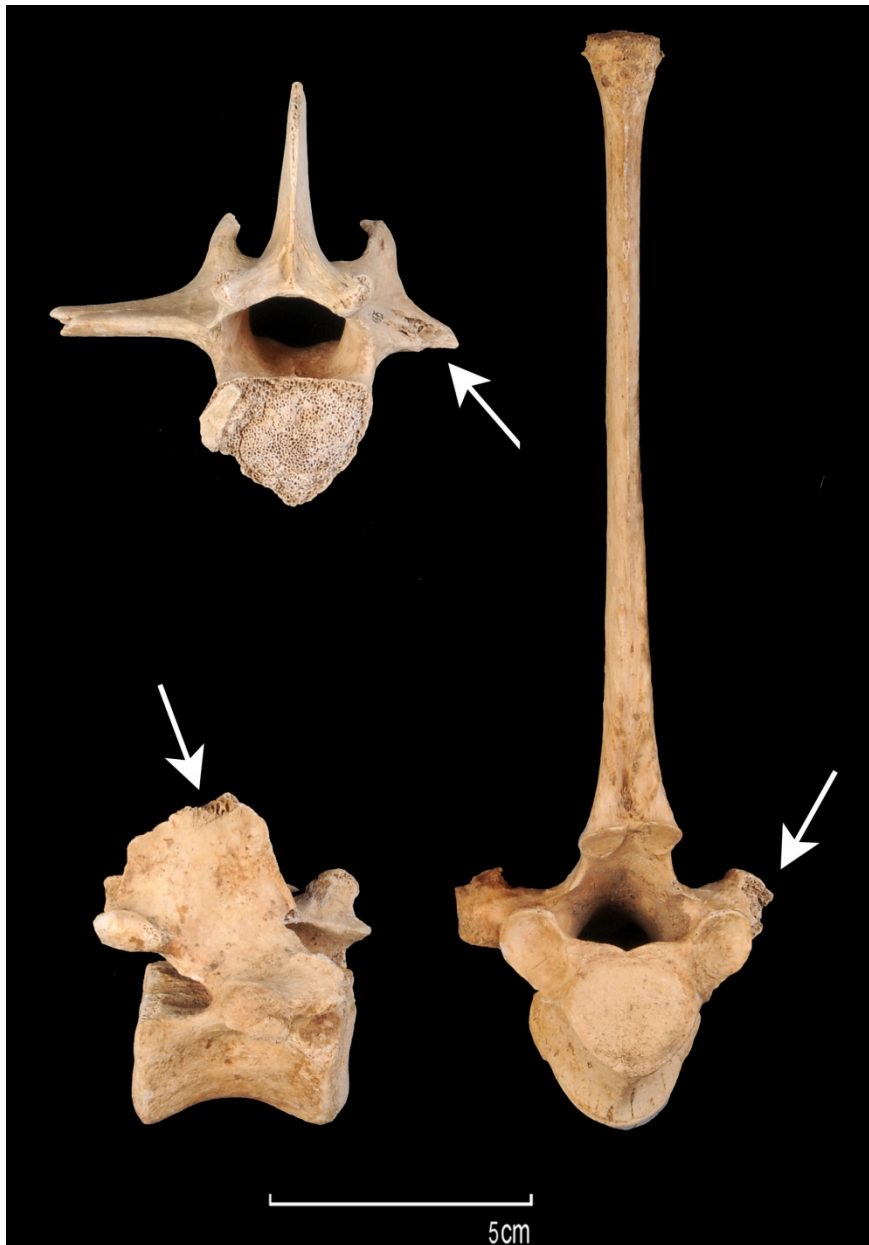

Figure B: Taphotypes for ulnae from the OCS.

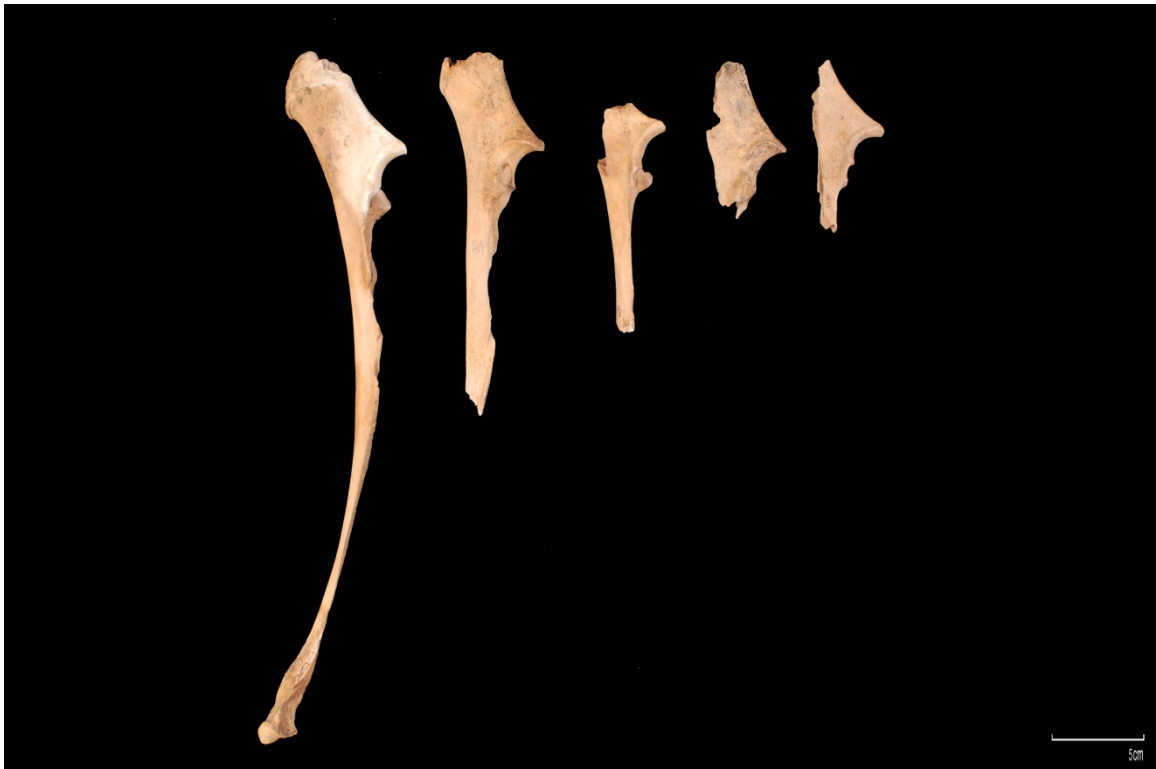

Figure C: Taphotypes for radius from the OCS.

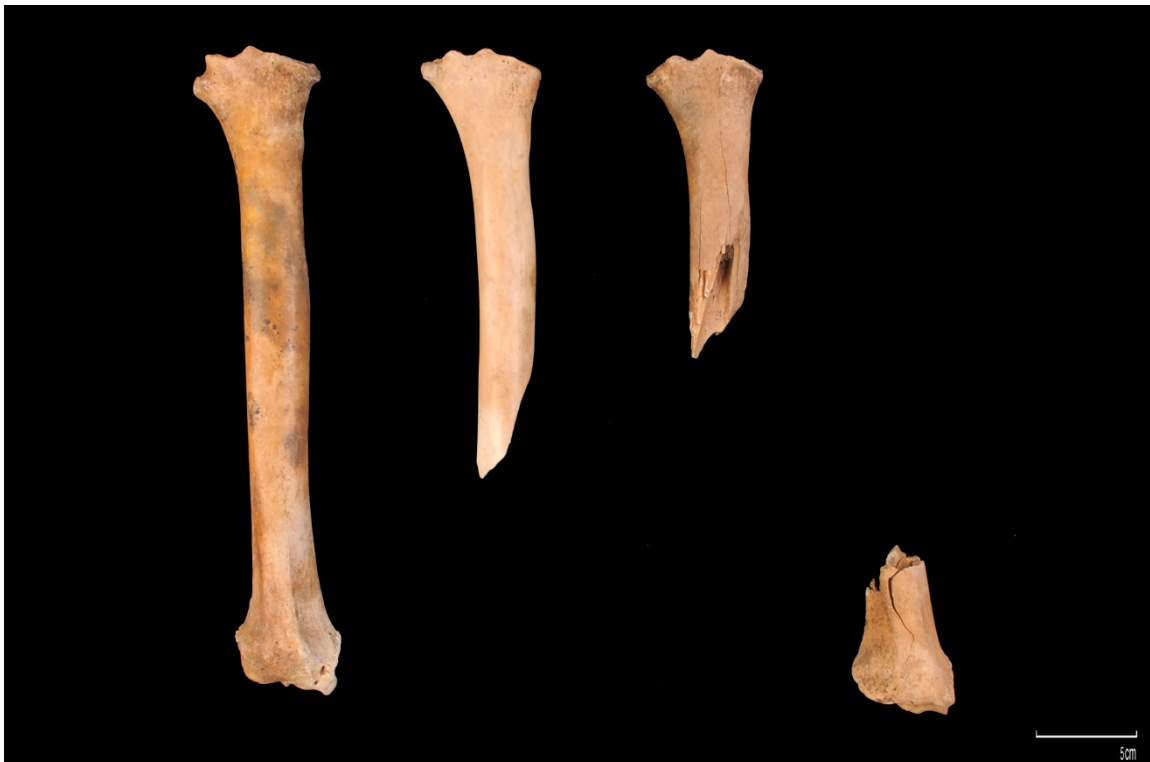

Figure D: Taphotypes for tibiae from the OCS.

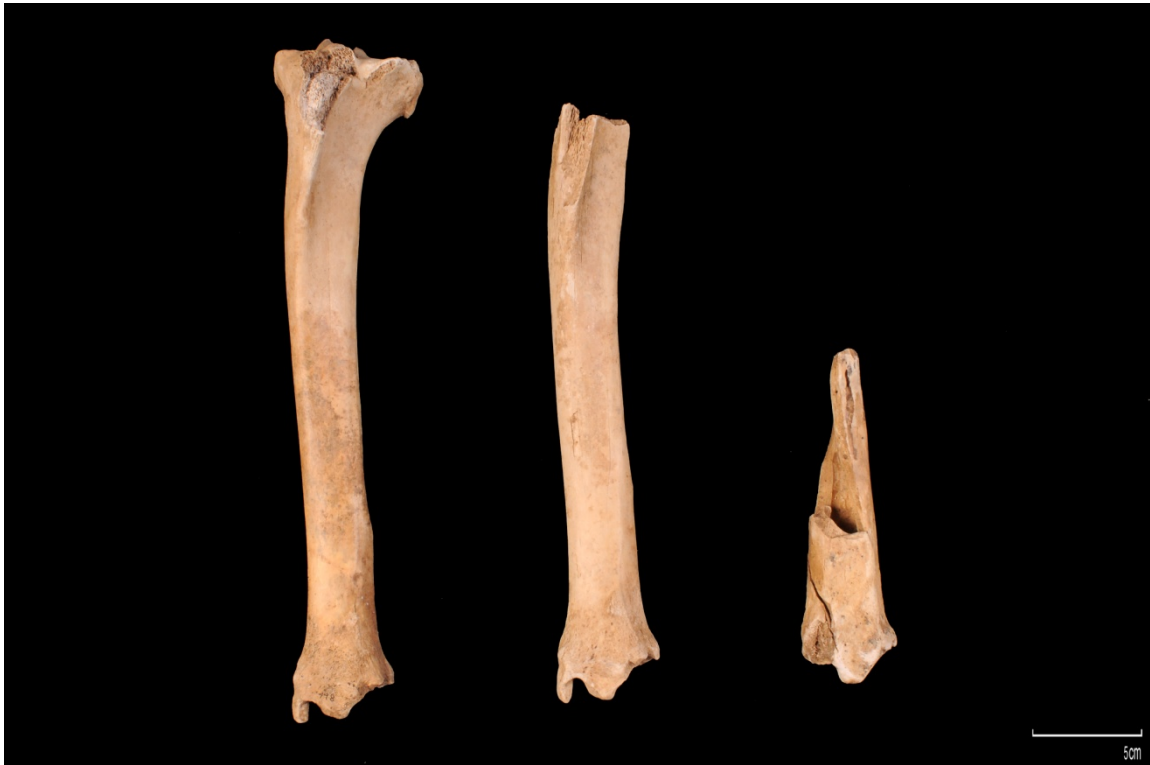

Figure E: Taphotypes for humerus from the OCS.

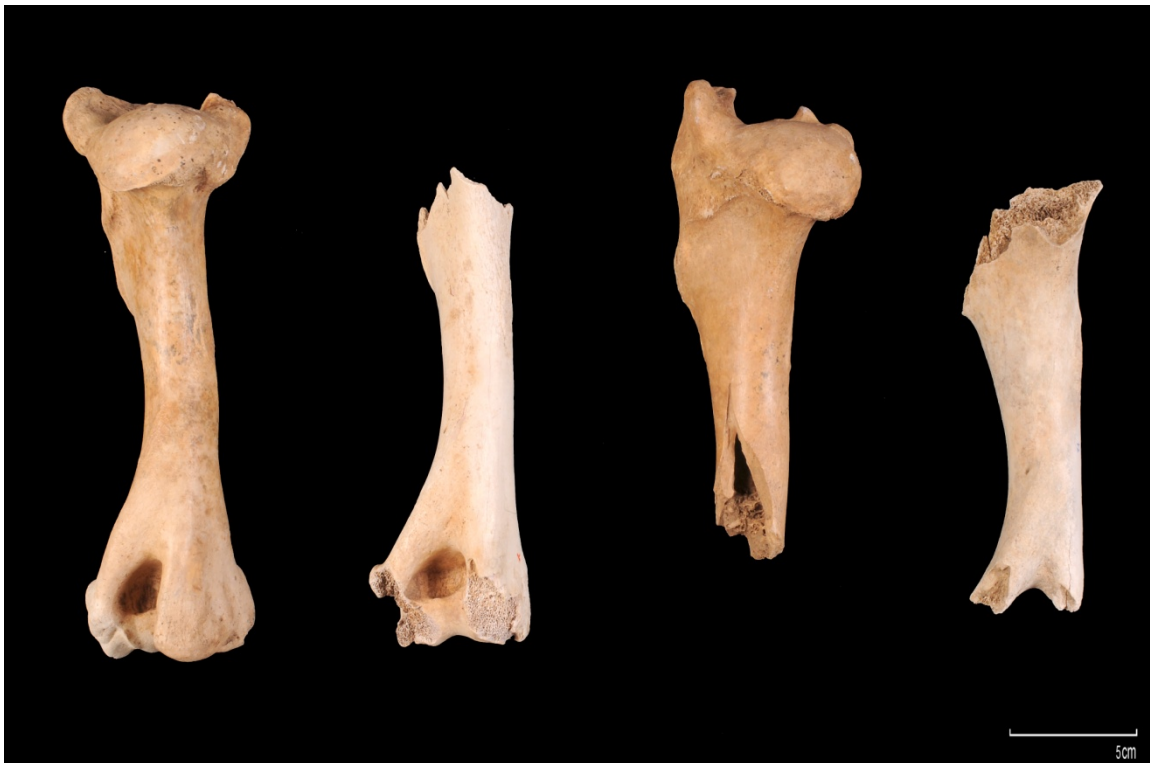

Figure F: Taphotypes for femur from the OCS.

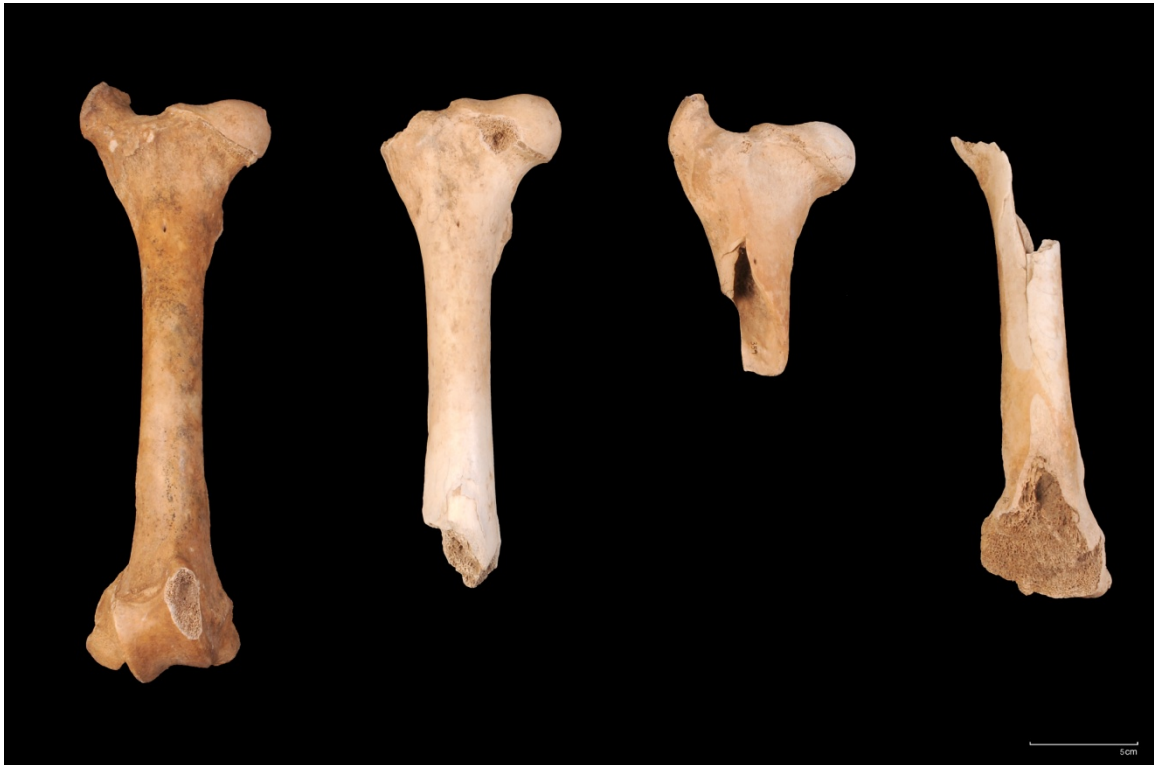

Figure G: Tooth mark on an atlas vertebra from the OCS.

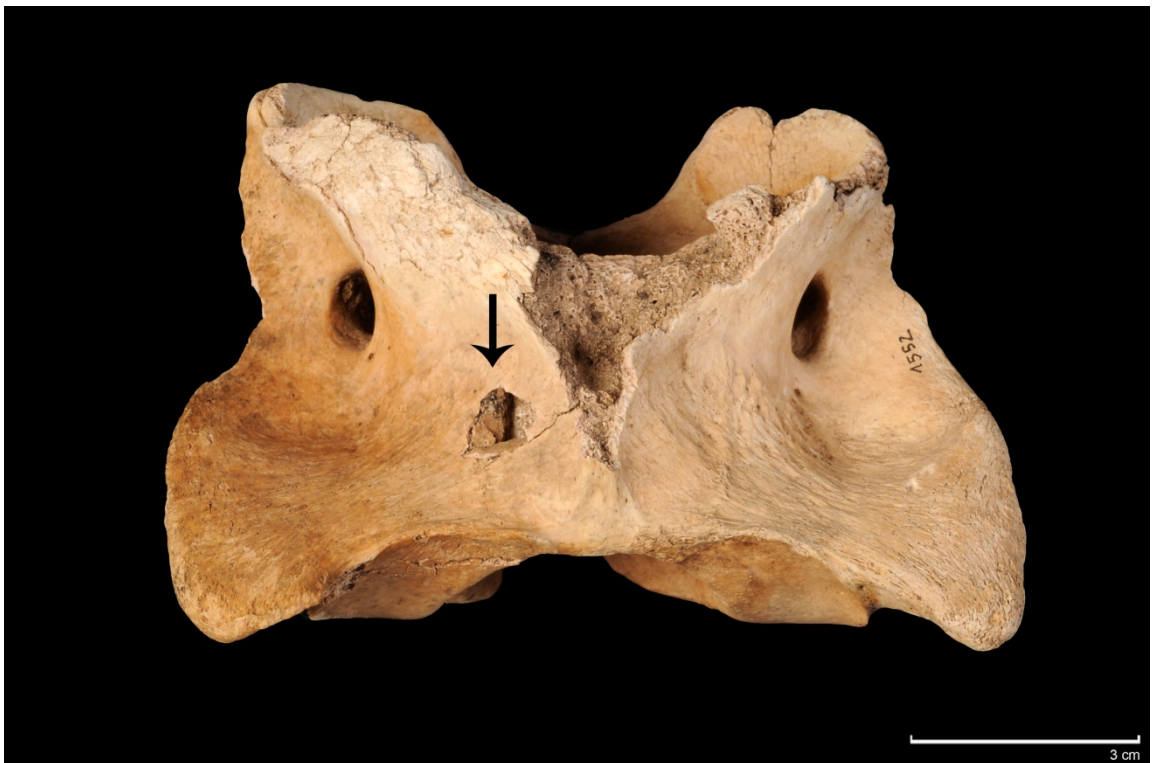

Supplement: pone.0153797.s002.pdf [file pone.0153797.s002.pdf]
